# Supplementary material for: Rapid formation of AgnX(X = S, Cl, PO4, C2O4) nanotubes via an acid-etching anion exchange reaction
Source: Royal Society of Chemistry journal article supplement (doi:10.1039/c4nr00364k), 2014-01-01
Supplement: c4nr00364k1.pdf [file c4nr00364k1.pdf]

## Rapid Formation of $\text{Ag}_n\text{X}$ ( $\text{X}=\text{S}, \text{Cl}, \text{PO}_4, \text{C}_2\text{O}_4$ ) Nanotubes via an Acid-Etching Anion Exchange Reaction

Jingjing Li,<sup>a</sup> Wenlong Yang,<sup>a</sup> Jiqiang Ning,<sup>b</sup> Yijun Zhong,<sup>\*c</sup> and Yong Hu<sup>\*a</sup>

### Experimental details

*Materials Synthesis.* All reagents are of analytical grade, purchased from Shanghai Chemical Reagent Factory, and used as received without further purification.  $\text{Ag}_2\text{CO}_3$  nanorods were prepared via a procedure reported in our previous work.<sup>8</sup> Briefly, 0.085g of  $\text{AgNO}_3$ , 1g of polyvinylpyrrolidone (PVP, MW~ 58K) were dissolved in 20mL of distilled water to form a clear solution, followed by a dropwise addition of 20 mL of pre-prepared  $\text{NaHCO}_3$  aqueous solution (0.05 M). The solution turned grey after several minutes, indicating the initial formation of  $\text{Ag}_2\text{CO}_3$  nanorods. The mixture was continuously stirred for 1 h at room temperature and collected by centrifugation. After washing with water and ethanol for three times, the as-prepared  $\text{Ag}_2\text{CO}_3$  nanorods were dried at 60 °C for 6 h.

*Synthesis of  $\text{Ag}_n\text{X}$  ( $\text{X}=\text{S}, \text{Cl}, \text{PO}_4, \text{C}_2\text{O}_4$ ) NTs.* In a typical procedure, 30 mg of as-obtained  $\text{Ag}_2\text{CO}_3$  templates and 60 mg of thioacetamide (TAA) were dispersed in 10mL of ethanol under stirring, followed by a dropwise addition of 5 mL of pre-prepared  $\text{CH}_3\text{COOH}$  (80  $\mu\text{L}$ ) ethanol solution. After 10 minutes, the precipitates were collected by centrifugation and washed with water and ethanol for three times, and the as-prepared  $\text{Ag}_2\text{S}$  NTs were dried at 60 °C for 2 h. In the case of  $\text{AgPO}_4$  NTs, ethanol was used as the organic solvent. For  $\text{AgCl}$  and  $\text{Ag}_2\text{C}_2\text{O}_4$  NTs, EG was selected to produce as the organic solution.

*Synthesis of  $\text{Ag}_2\text{CO}_3\text{-Ag}_n\text{X}$  yolk-shell nanostructures.* The intermediate nanostructures were all prepared with the same method described above except different acid amounts. 20  $\mu\text{L}$ , 40 $\mu\text{L}$  and 60  $\mu\text{L}$  of  $\text{CH}_3\text{COOH}$  were used, respectively, to obtain intermediate  $\text{Ag}_2\text{CO}_3\text{-Ag}_2\text{S}$  yolk-shell nanotubes. For  $\text{Ag}_2\text{CO}_3\text{-Ag}_n\text{X}$  ( $\text{X} = \text{Cl}, \text{PO}_4, \text{C}_2\text{O}_4$ ) yolk-shell nanostructures, 8  $\mu\text{L}$  of  $\text{HCl}$ , 1 $\mu\text{L}$  of  $\text{H}_3\text{PO}_4$  and 6 mg of  $\text{H}_2\text{C}_2\text{O}_4$  were used, respectively.

*Materials Characterization.* Powder X-ray diffraction (XRD) patterns were recorded by using  $\text{Cu } K_\alpha$  irradiation on a Philips PW3040/60 X-ray diffractometer operated with a scanning rate of  $0.06 \text{ deg s}^{-1}$ . Scanning electron microscopy (SEM) analysis was performed with a Hitachi S-4800 scanning electron micro-analyzer using an accelerating voltage of 15 kV. Transmission electron microscopy (TEM) and high-resolution transmission electron microscopy (HRTEM) were conducted at 200 Kv with a JEM-2100F field emission TEM. Samples for TEM measurements were prepared by dispersing the products in ethanol and placing several drops of the suspension on holey carbon films supported by copper grids.

*Photocatalytic test.* The photocatalytic activities of the  $\text{Ag}_n\text{X}$  nanotubes were evaluated by degrading of RhB aqueous solution under visible light irradiation from a 500 W Xe lamp equipped with one 420nm cut off filter. The reaction cell was placed in a sealed black box with the top open, and the cut off filter was placed to provide visible-light irradiation. In a typical process, 10mg of different as-prepared  $\text{Ag}_n\text{X}$  nanotubes as photocatalysts were added into 20mL of RhB solution (concentration: 5 mg/L). After being dispersed in an ultrasonic bath for 5 min, the solution was stirred

for 2 h in the dark to reach adsorption equilibrium and then exposed to visible light irradiation. The photocatalysts were removed by centrifugation at given time intervals, and the RhB concentration was measured colorimetrically at 550 nm using the UV-vis spectroscopy.

**Table S1.** Different molar ratio of the Ag and S prepared with different volume of CH<sub>3</sub>COOH.

| CH <sub>3</sub> COOH volume<br>( $\mu$ L) | Atomic (%) |      | Molar ratio<br>(Ag : S) |
|-------------------------------------------|------------|------|-------------------------|
|                                           | Ag         | S    |                         |
| 20                                        | 15.35      | 4.35 | 3.5                     |
| 40                                        | 17.70      | 6.64 | 2.7                     |
| 60                                        | 15.80      | 7.19 | 2.2                     |
| 80                                        | 17.30      | 8.40 | 2.0                     |

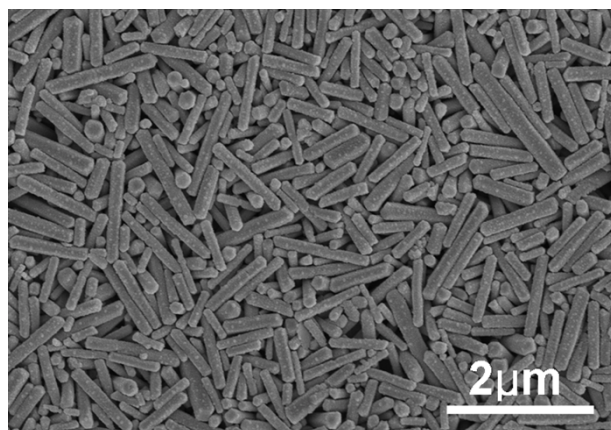

**Fig. S1.** SEM image of Ag<sub>2</sub>CO<sub>3</sub> nanorods.

**Fig. S2.** SEM images of the as-prepared Ag<sub>n</sub>X obtained in water: a) Ag<sub>2</sub>S, b) AgCl, c) Ag<sub>3</sub>PO<sub>4</sub>, d) Ag<sub>2</sub>C<sub>2</sub>O<sub>4</sub>.

**Fig. S3.** SEM images of the as-prepared (a) AgCl (a) and (b) Ag<sub>2</sub>C<sub>2</sub>O<sub>4</sub> obtained in ethanol.

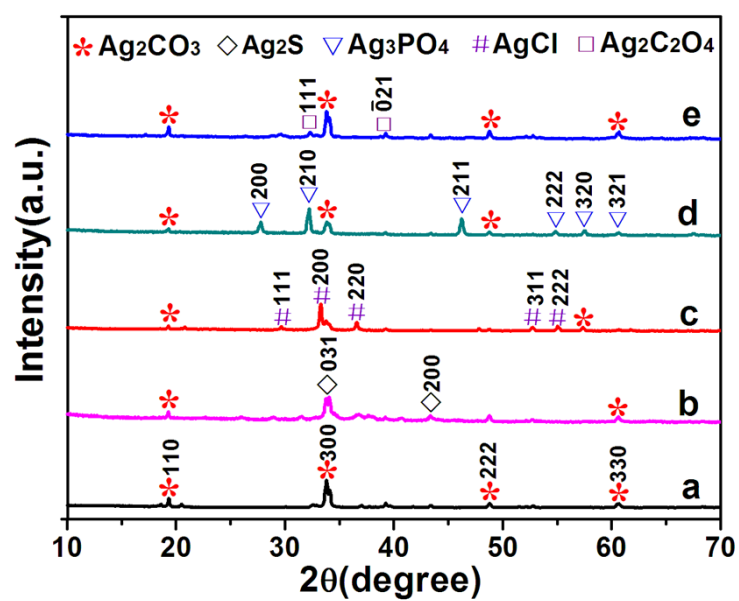

**Fig. S4.** XRD patterns of (a) the as-prepared pure Ag<sub>2</sub>CO<sub>3</sub> nanorods and different Ag<sub>2</sub>CO<sub>3</sub>-Ag<sub>n</sub>X yolk-shell nanostructures: (b)Ag<sub>2</sub>CO<sub>3</sub>-Ag<sub>2</sub>S; (c)Ag<sub>2</sub>CO<sub>3</sub>-AgCl; (d)Ag<sub>2</sub>CO<sub>3</sub>-Ag<sub>3</sub>PO<sub>4</sub>; (e)Ag<sub>2</sub>CO<sub>3</sub>-Ag<sub>2</sub>C<sub>2</sub>O<sub>4</sub>.

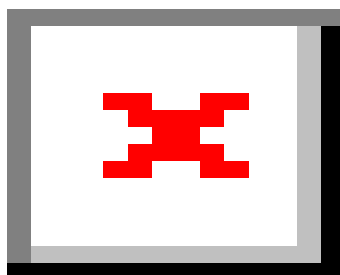

**Fig. S5.** SEM images of the as-obtained  $\text{Ag}_n\text{X}$  samples with the different salts: (a)  $\text{Na}_2\text{S}$ ; (b)  $\text{NaCl}$ ; (c)  $\text{Na}_2\text{HPO}_4$ ; (d)  $\text{Na}_2\text{C}_2\text{O}_4$ .

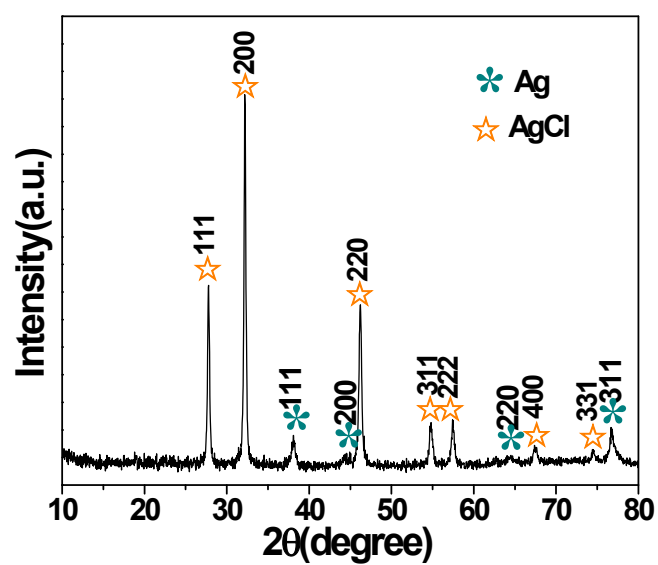

**Fig. S6.** XRD pattern of the  $\text{AgCl}$  NTs after six cycles of the photocatalytic test.

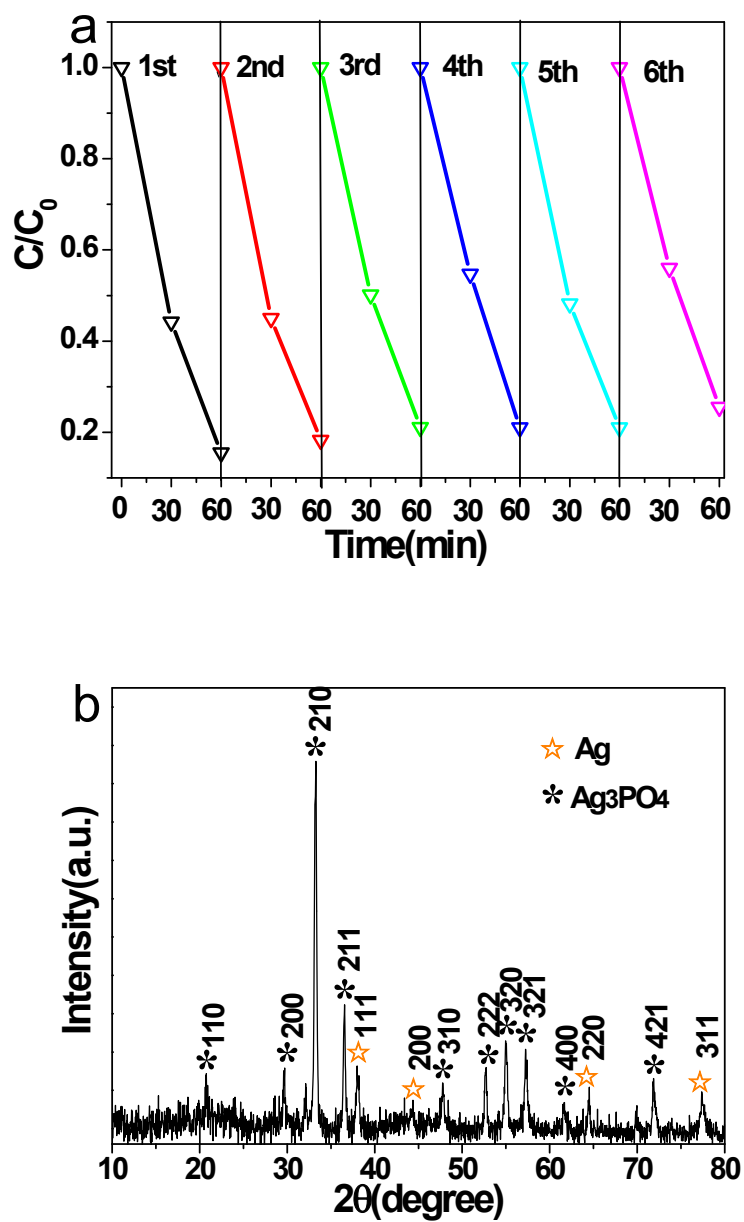

**Fig. S7.** (a) 6 cycles of degradation of RhB using  $Ag_3PO_4$  NTs as photocatalyst; (b) XRD pattern of the  $Ag_3PO_4$  NTs after six cycles of the photocatalytic test.
